# Supplementary material
Source: PubMed Central journal article supplement (PMC7756984)
Supplement: advancesADV2020003418-suppl1.pdf [file advancesADV2020003418-suppl1.pdf]

**Supplementary Table 1.** NRM at one year after alloSCT in different patient age groups over time.

| Patient age | 1980-89              | 1990-99              | 2000-2009            | 2010-2016            |
|-------------|----------------------|----------------------|----------------------|----------------------|
| 20-40y      | 28.9%<br>[26.3-31.6] | 21.3%<br>[19.7-22.9] | 11.3%<br>[10.4-12.2] | 8.3%<br>[7.6-9.2]    |
| 40-60y      | 36.5%<br>[29.7-43.4] | 29.5%<br>[27.5-31.6] | 16.6%<br>[15.7-17.4] | 12.6%<br>[11.9-13.4] |
| > 60y       | No patients          | 25%<br>[13.2-38.6]   | 19.1%<br>[17.3-21]   | 16.6%<br>[15.3-17.9] |

**Supplementary Table 2.** Results of multivariate analyses.

|                                              |                | TRM              |           | OS               |           | PFS              |           | RI               |           | AGVH II-IV       |           | AGVH III-IV      |           | CGVH             |           | Ext CGVH         |           |
|----------------------------------------------|----------------|------------------|-----------|------------------|-----------|------------------|-----------|------------------|-----------|------------------|-----------|------------------|-----------|------------------|-----------|------------------|-----------|
| Variable                                     | Level          | HR               | P         |
| Year of transplantat ion (5 years increment) |                | 0.78 [0.77-0.8]  | < 0.000 1 | 0.86 [0.85-0.87] | < 0.000 1 | 0.89 [0.88-0.9]  | < 0.000 1 | 0.96 [0.94-0.97] | < 0.000 1 | 0.92 [0.91-0.94] | < 0.000 1 | 0.9 [0.88-0.93]  | < 0.000 1 | 0.99 [0.97-1]    | 0.11      | 1 [0.97-1.02]    | 0.77      |
| Previous autologous transplantat ion(s)      | Reference: Yes |                  |           |                  |           |                  |           |                  |           |                  |           |                  |           |                  |           |                  |           |
|                                              | No             | 0.85 [0.77-0.93] | 0.001     | 0.88 [0.82-0.94] | < 0.000 1 | 0.81 [0.76-0.86] | < 0.000 1 | 0.79 [0.74-0.85] | < 0.000 1 | 1.12 [1.02-1.22] | 0.014     | 1.09 [0.96-1.25] | 0.19      | 0.89 [0.82-0.96] | 0.003     | 0.92 [0.82-1.02] | 0.12      |
| Cell source                                  | Reference: BM  |                  |           |                  |           |                  |           |                  |           |                  |           |                  |           |                  |           |                  |           |
|                                              | PB             | 1 [0.94-1.07]    | 0.96      | 1.04 [1-1.09]    | 0.055     | 1.03 [0.99-1.07] | 0.16      | 1.05 [1-1.11]    | 0.042     | 0.88 [0.83-0.92] | < 0.000 1 | 0.97 [0.9-1.06]  | 0.55      | 1.64 [1.56-1.73] | < 0.000 1 | 1.76 [1.63-1.89] | < 0.000 1 |
| Diagnosis                                    | Reference: ALL |                  |           |                  |           |                  |           |                  |           |                  |           |                  |           |                  |           |                  |           |
|                                              | AML            | 0.8 [0.75-0.85]  | < 0.000 1 | 0.83 [0.79-0.87] | < 0.000 1 | 0.8 [0.77-0.83]  | < 0.000 1 | 0.8 [0.76-0.84]  | < 0.000 1 | 0.85 [0.8-0.89]  | < 0.000 1 | 0.85 [0.78-0.92] | 0.000 2   | 0.95 [0.9-1]     | 0.04      | 0.92 [0.85-0.99] | 0.03      |
|                                              | Lympho ma      | 0.85 [0.77-0.93] | 0.000 8   | 0.55 [0.51-0.58] | < 0.000 1 | 0.6 [0.57-0.64]  | < 0.000 1 | 0.49 [0.46-0.53] | < 0.000 1 | 0.99 [0.92-1.07] | 0.87      | 1.04 [0.92-1.18] | 0.5       | 0.8 [0.74-0.86]  | < 0.000 1 | 0.79 [0.7-0.88]  | < 0.000 1 |
|                                              | MDS / MPN      | 0.79 [0.72-0.87] | < 0.000 1 | 0.5 [0.47-0.53]  | < 0.000 1 | 0.51 [0.48-0.54] | < 0.000 1 | 0.39 [0.36-0.42] | < 0.000 1 | 0.91 [0.84-0.99] | 0.019     | 1.02 [0.91-1.15] | 0.73      | 0.96 [0.9-1.04]  | 0.32      | 1 [0.9-1.11]     | 1         |



|                                  |                                               |                         |                 |                      |                 |                      |                 |                      |                 |                      |                 |                      |                 |                      |                 |                      |                 |
|----------------------------------|-----------------------------------------------|-------------------------|-----------------|----------------------|-----------------|----------------------|-----------------|----------------------|-----------------|----------------------|-----------------|----------------------|-----------------|----------------------|-----------------|----------------------|-----------------|
|                                  | No                                            | 1.11<br>[1.04-<br>1.19] | 0.001           | 0.97 [0.93-<br>1.01] | 0.13            | 0.91 [0.88-<br>0.95] | <<br>0.000<br>1 | 0.83 [0.8-<br>0.87]  | <<br>0.000<br>1 | 1.38 [1.31-<br>1.46] | <<br>0.000<br>1 | 1.47 [1.34-<br>1.6]  | <<br>0.000<br>1 | 1.88 [1.79-<br>1.98] | <<br>0.000<br>1 | 2.25 [2.09-<br>2.42] | <<br>0.000<br>1 |
|                                  |                                               |                         |                 |                      |                 |                      |                 |                      |                 |                      |                 |                      |                 |                      |                 |                      |                 |
| Region of<br>transplantat<br>ion | Refer-<br>ence:<br>North<br>Western<br>Europe |                         |                 |                      |                 |                      |                 |                      |                 |                      |                 |                      |                 |                      |                 |                      |                 |
|                                  | Eastern<br>Europe                             | 1.22<br>[1.09-<br>1.37] | 0.000<br>6      | 1.17 [1.09-<br>1.25] | <<br>0.000<br>1 | 1.15 [1.08-<br>1.23] | <<br>0.000<br>1 | 1.12 [1.04-<br>1.22] | 0.004           | 0.9 [0.82-<br>0.98]  | 0.023           | 0.95 [0.82-<br>1.1]  | 0.53            | 0.78 [0.71-<br>0.86] | <<br>0.000<br>1 | 0.62 [0.53-<br>0.71] | <<br>0.000<br>1 |
|                                  | Southern<br>Europe                            | 1.15<br>[1.08-<br>1.21] | <<br>0.000<br>1 | 1.23 [1.18-<br>1.27] | <<br>0.000<br>1 | 1.24 [1.2-<br>1.28]  | <<br>0.000<br>1 | 1.3 [1.24-<br>1.35]  | <<br>0.000<br>1 | 0.97 [0.92-<br>1.02] | 0.23            | 0.87 [0.81-<br>0.95] | 0.000<br>8      | 0.91 [0.87-<br>0.95] | <<br>0.000<br>1 | 0.88 [0.83-<br>0.94] | 0.000<br>2      |
|                                  | Other                                         | 1.54<br>[1.39-<br>1.71] | <<br>0.000<br>1 | 1.26 [1.17-<br>1.35] | <<br>0.000<br>1 | 1.13 [1.06-<br>1.21] | 0.000<br>2      | 0.96 [0.89-<br>1.05] | 0.38            | 1.14 [1.05-<br>1.23] | 0.002           | 1.17 [1.03-<br>1.33] | 0.014           | 0.86 [0.8-<br>0.93]  | 0.000<br>1      | 1.07 [0.96-<br>1.19] | 0.2             |
